# Supplementary material for: Probing genomic diversity and evolution of Escherichia coli O157 by single nucleotide polymorphisms
Source: HighWire-hosted journal article supplement (doi:10.1101/gr.4759706), 2006-04-10
Supplement: Suppl1._Fig._2._Mutation_mapping_of_pO157.pdf [file Suppl1._Fig._2._Mutation_mapping_of_pO157.pdf]

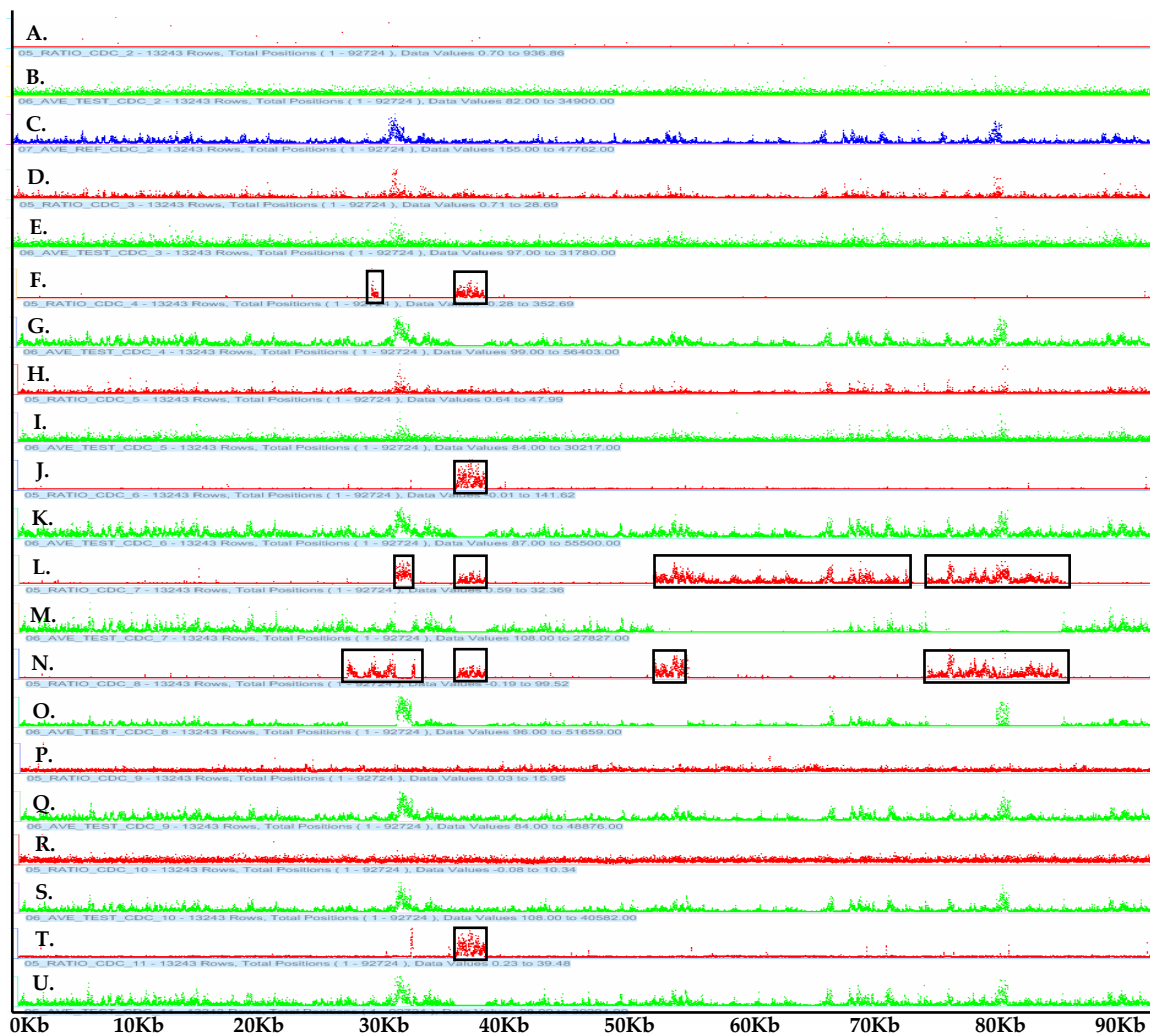

**Supplementary Figure 2.** DNA polymorphisms in large virulence plasmids (pO157s). Probes tiling every seven base pairs across 92 Kb of the Sakai pO157 are hybridized to both test and reference plasmid DNA samples to map points of deviation between a test plasmid and the Sakai plasmid. The plot C (blue color) shows the hybridization signal intensity of the Sakai pO157. The plots B, E, G, I, K, M, O, Q, S, and U (green color) show the hybridization signal intensity for pO157s of strains G5289, 01-577, F8768, F5733, F6141, 493/89, G5101, N0303, N0436, and N0587, respectively. Ratios of hybridization signal intensity between each test pO157 and the Sakai pO157 are calculated at each base position, and are shown in the ratio plots A, D, F, H, J, L, N, P, R, T in the same order (red color). Detailed algorithms for calculation of hybridization signal intensity and ratio are provided as supplementary material with this article. Regions of major deletions in the test pO157s are highlighted in black rectangles.
